# Supplementary material for: A quantum spin liquid candidate isolated in a two-dimensional CoIIRhIII bimetallic oxalate network
Source: Royal Society of Chemistry journal article supplement (doi:10.1039/d2sc06407c), 2023-01-01
Supplement: d2sc06407c1.pdf [file d2sc06407c1.pdf]

## A quantum spin liquid candidate isolated in a two-dimensional Co<sup>II</sup>Rh<sup>III</sup> bimetallic oxalate network

Enrique Burzurí,<sup>\*a,b,c</sup> María José Martínez-Pérez,<sup>d</sup> Carlos Martí-Gastaldo,<sup>e</sup> Marco Evangelisti,<sup>d</sup> Samuel Mañas-Valero,<sup>e</sup> Eugenio Coronado,<sup>e</sup> Jesús I. Martínez,<sup>d</sup> Jose Ramon Galan-Mascaros<sup>f,g</sup> and Fernando Luis <sup>\*d</sup>

<sup>a</sup> Departamento de Física de la Materia Condensada, Universidad Autónoma de Madrid, E-28049 Madrid, Spain

<sup>b</sup> Condensed Matter Physics Center (IFIMAC) and Instituto Universitario de Ciencia de Materiales "Nicolás Cabrera" (INC), Universidad Autónoma de Madrid, E-28049 Madrid, Spain

<sup>c</sup> IMDEA Nanociencia, C/Faraday 9, Ciudad Universitaria de Cantoblanco, Madrid, Spain.

<sup>d</sup> Instituto de Nanociencia y Materiales de Aragón (INMA), CSIC- Universidad de Zaragoza, Zaragoza 50009, Spain

<sup>e</sup> Instituto de Ciencia Molecular (ICMol), Universidad de Valencia, Calle Catedrático José Beltrán 2, 46980, Paterna, Spain.

<sup>f</sup> Institute of Chemical Research of Catalonia (ICIQ), The Barcelona Institute of Science and Technology (BIST), Av. Paisos Catalans 16, 43007 Tarragona, Spain

<sup>g</sup> ICREA, Passeig Lluís Companys 23, 08010 Barcelona, Spain.

### Table of contents

|                                                                                        |   |
|----------------------------------------------------------------------------------------|---|
| <b>S1. X-ray powder diffraction (XRPD) spectroscopy</b> .....                          | 2 |
| <b>S2. Inductively Coupled Plasma Mass Spectrometry (ICP-MS)</b> .....                 | 3 |
| <b>S3. Additional Electron Paramagnetic Resonance (EPR) spectroscopy spectra</b> ..... | 4 |
| <b>S4. Electronic level structure of Co<sup>2+</sup> in [PNP]CoRh</b> .....            | 5 |
| <b>S5. Modelling of the specific heat measurements</b> .....                           | 6 |
| Schottky contribution: Fluctuation-dissipation theorem .....                           | 6 |
| Heisenberg model for a $J = 1/2$ system .....                                          | 6 |
| <b>S6. Entropy</b> .....                                                               | 6 |
| <b>S7. Modelling of the magnetic susceptibility measurements</b> .....                 | 8 |
| <b>S8. Bibliography</b> .....                                                          | 9 |

## S1. X-ray powder diffraction (XRPD) spectroscopy

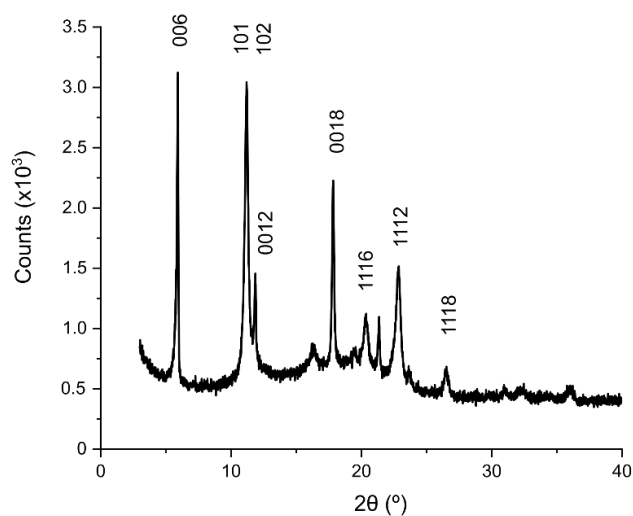

**Figure S 1.** PNP[CoRh(ox)<sub>3</sub>] X-ray powder diffraction (XRPD) profile indexed following Ref. <sup>1</sup>

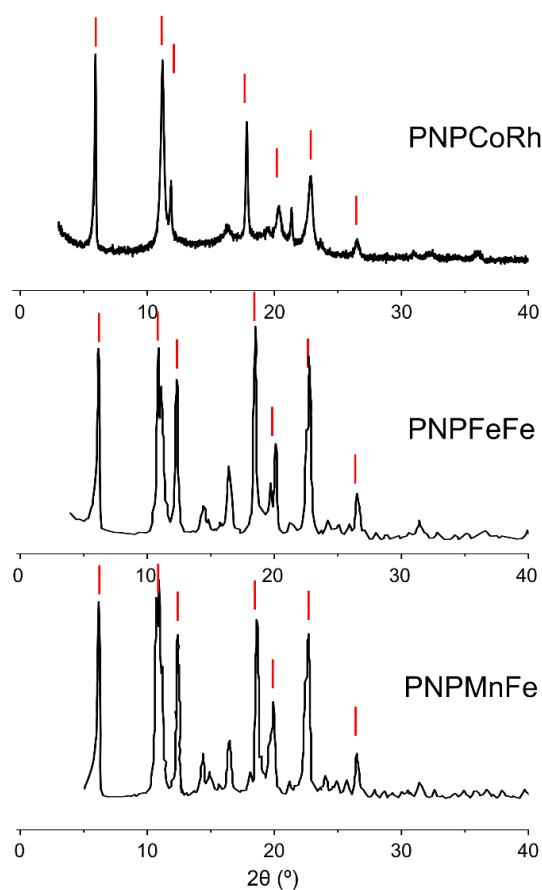

**Figure S 2.** Comparison between X-ray powder diffraction patterns of PNP[CoRh(ox)<sub>3</sub>] and of the isostructural PNP[FeFe(ox)<sub>3</sub>] and PNP[MnFe(ox)<sub>3</sub>] adapted from Ref. <sup>1</sup> The main diffraction peaks in PNP[CoRh(ox)<sub>3</sub>] (red lines) coincide with those reported in Ref. <sup>1</sup> for structural equivalent materials with different metallic centers.

**Table S 1.** Refined unit cell parameters of PNP[FeFe(ox)<sub>3</sub>] and PNP[MnFe(ox)<sub>3</sub>] at room temperature reported in Ref.<sup>1</sup>

| Compound                    | Space group used for refinement | <i>a</i> (Å) | <i>b</i> (Å) | <i>c</i> (Å) | Interlayer distance (Å) |
|-----------------------------|---------------------------------|--------------|--------------|--------------|-------------------------|
| PNP[FeFe(ox) <sub>3</sub> ] | P 6(5)                          | 9.38(1)      | 9.38(1)      | 86.6(2)      | 14.5                    |
| PNP[MnFe(ox) <sub>3</sub> ] | P 6(5)                          | 9.41(1)      | 9.41(1)      | 87.1(2)      | 14.5                    |

## S2. Inductively Coupled Plasma Mass Spectrometry (ICP-MS)

The metallic proportion of the PNP[CoRh(ox)<sub>3</sub>] samples is determined by inductively coupled plasma mass spectroscopy. First, the sample is atomized in a microwaves oven. Thereafter the Co/Rh ratio is determined in a Agilent 7900 ICP-MS. The result on two different test samples is summarized in Table S2:

**Table S 2.** Co and Rh composition measured in a Agilent 7900 ICP-MS

| Sample                                | Co (mg/g)  | Rh (mg/g)  |
|---------------------------------------|------------|------------|
| PNP[CoRh(ox) <sub>3</sub> ]- Sample 1 | 25.2 ± 0.4 | 49.4 ± 0.8 |
| PNP[CoRh(ox) <sub>3</sub> ]- Sample 2 | 14.8 ± 0.3 | 30.8 ± 0.2 |

Taking into account the atomic mass of Co and Rh: 58.999 g/mol and 102.9055 g/mol, the Co/Rh ratio in the material can be estimated, as summarized in Table S3. The value is very close to a 1:1 ratio expected for the PNP[CoRh(ox)<sub>3</sub>] oxalate.

**Table S 3.** Rh/Co ratio estimated from the ICP-MS analysis in Table S2

| Sample                                | Co (mmol/g) | Rh (mmol/g) | Rh/Co Ratio |
|---------------------------------------|-------------|-------------|-------------|
| PNP[CoRh(ox) <sub>3</sub> ]- Sample 1 | 0.427       | 0.480       | 1.124       |
| PNP[CoRh(ox) <sub>3</sub> ]- Sample 2 | 0.251       | 0.299       | 1.193       |

The complex formula is [Ph<sub>3</sub>NNPh<sub>3</sub>][CoRh(C<sub>2</sub>O<sub>4</sub>)<sub>3</sub>](H<sub>2</sub>O)<sub>3</sub> with sum: N<sub>2</sub>O<sub>15</sub>RhCoC<sub>42</sub>H<sub>36</sub>. The molecular weight is m<sub>w</sub>= 970.5910 g/mol

### S3. Additional Electron Paramagnetic Resonance (EPR) spectroscopy spectra

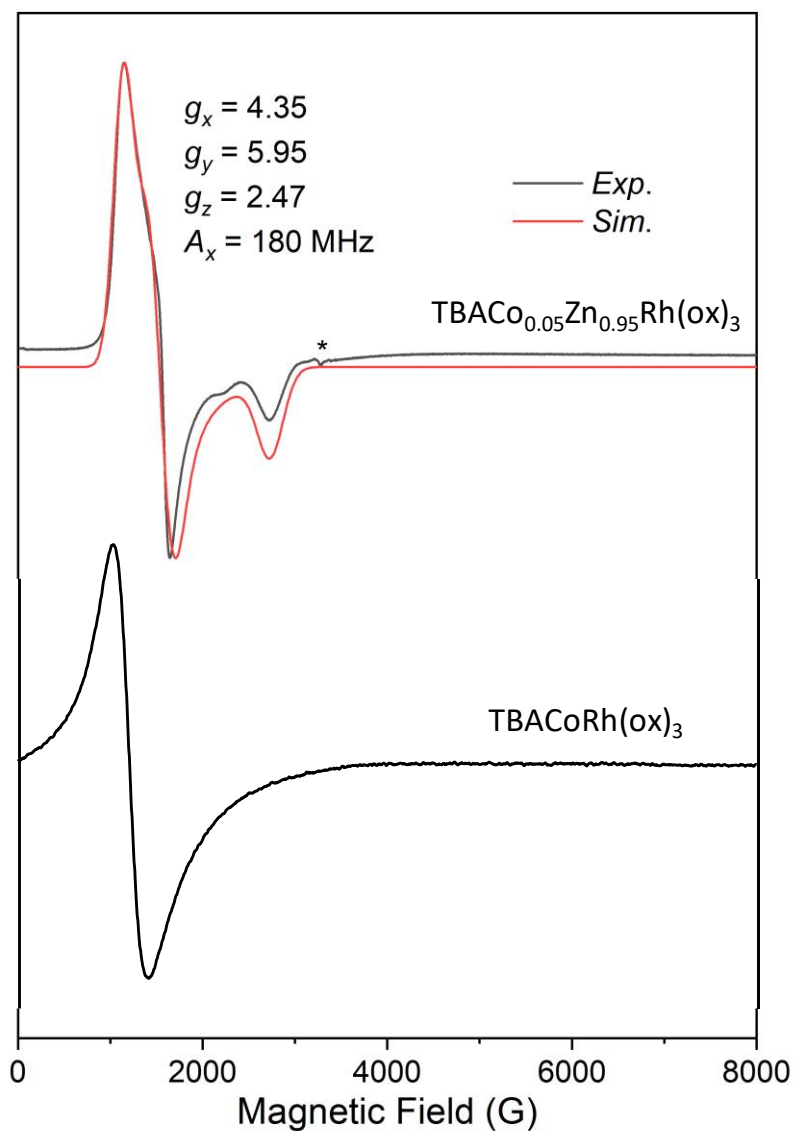

**Figure S 3** The analogous isolated [tetrabutylammonium (TBA)]CoRh(ox)<sub>3</sub> center, with an identical 2D CoRh oxalate lattice, was dissolved in a Zn (diamagnetic) matrix. The corresponding EPR spectrum can be understood from a distorted octahedral environment of Co(II). The simulation allows determining the anisotropic  $g$  values and an upper limit for the hyperfine splitting. The magnetic exchange interaction in the all-Co(II) sample causes an averaging of the  $g$  anisotropy, asymmetric shape and the apparent shift to lower fields of the signal. All the spectra were taken at 20K. An asterisk is marking a spurious signal from impurities.

## S4. Electronic level structure of $\text{Co}^{2+}$ in $[\text{PNP}]\text{CoRh}$

The electronic configuration of a  $\text{Co}^{2+}$  ion is  $[\text{Ar}]3d^7$ . The electronic ground state according to Hund's rules is then  ${}^4\text{F}$  with  $L = 3$  and  $S = 3/2$ , resulting in  $2L+1 = 7$  initially degenerated levels for the free ion, as seen in Figure S4.

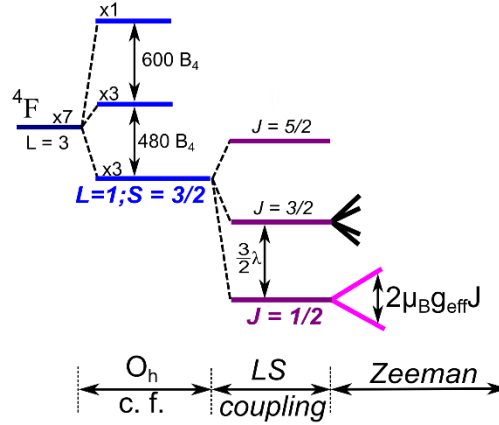

**Figure S 4.** Energy level diagram of the  $\text{Co}^{2+}$  in an octahedral field resulting from the successive application of the interaction terms in Eq. 1. The ground state can be described with an effective angular momentum  $J = 1/2$  and  $g_{\text{eff}} = 4.33$ .<sup>2</sup>

The Hamiltonian describing  $\text{Co}^{2+}$  ions in the octahedral ligand field introduced by the coordination with the oxalate ligands is:

$$\mathcal{H} = \mathcal{H}_{\text{crys}} + \mathcal{H}_{\text{SO}} + \mathcal{H}_{\text{hyperfine}} + \mathcal{H}_{\text{Zeeman}} \quad \text{Eq. 1}$$

where  $\mathcal{H}_{\text{crys}}$  is the crystal field contribution,  $\mathcal{H}_{\text{SO}}$  is the spin-orbit coupling,  $\mathcal{H}_{\text{hyperfine}}$  is the hyperfine contribution due to the coupling between nuclear and electronic spins and  $\mathcal{H}_{\text{Zeeman}}$  is the Zeeman contribution describing the interaction with the external magnetic field  $B$ .

The three oxalate ligands surrounding the  $\text{Co}^{2+}$  give rise to an octahedral symmetry of the form

$$\mathcal{H}_{\text{crys}} = B_4(O_4^0 + 5O_4^4) \quad \text{Eq. 2}$$

Where  $O_m^l$  are Stevens operators and  $B_4$  is related to the strength of the crystal field. Assuming an intermediate ligand field, the initially degenerate levels split as seen in Figure S4. The lowest lying energy level is a degenerate orbital triplet with an effective orbital momentum  $\hat{L} = 1$  and  $S = 3/2$ .

Finally the spin-orbit coupling given by  $\mathcal{H}_{\text{SO}} = \lambda \vec{L} \cdot \vec{S}$  breaks the ground state degeneracy into three sets of levels with effective angular momentum  $J = \pm 1/2, \pm 3/2, \pm 5/2$  as seen in Figure S4. The ground state can be described as a degenerate doublet  $J = \pm 1/2$  with  $g = 4.33$ .<sup>2</sup> Deviations from the latter value arise as a result of distortions from perfect octahedral symmetry and spin-spin interactions (see previous section).

## S5. Modelling of the specific heat measurements

### Schottky contribution: Fluctuation-dissipation theorem

The low temperature magnetic contribution to the specific heat ( $c_m$ ), known as Schottky contribution is calculated by using the fluctuation-dissipation theorem given by:

$$\frac{c_m}{R} = \frac{\langle U^2 \rangle - \langle U \rangle^2}{T^2} \quad \text{Eq. 3}$$

Where  $R$  is the gas constant and  $U$  is the internal magnetic energy of the system:

$$U = N_A \frac{\sum_i E_i e^{-\frac{E_i}{k_B T}}}{Z} \quad \text{Eq. 4}$$

where  $N_A$  is the Avogadro number,  $Z$  is the partition function and  $E_i$  are the magnetic energy levels obtained from the diagonalization of the spin Hamiltonian of each isolated  $\text{Co}^{2+}$  ion.

### Heisenberg model for a $J = 1/2$ system.

For  $B = 0$  and sufficiently low temperatures, the specific heat given by Eqs. 3 and 4 nearly vanishes, as the two levels associated with the  $J = 1/2$  ground state are degenerate and hyperfine interactions are too weak to give rise to a sizeable contribution. The specific heat high-temperature tail observed experimentally (see Figure 3b in the main text), requires then to go beyond the picture of isolated spins. Spin-spin interactions can be approximately modeled by using a  $J = 1/2$  Heisenberg model. The high- $T$  approximation for the specific heat is then:<sup>2</sup>

$$\frac{c}{R} = \frac{1}{2} \left( \frac{J(J+1)}{3K_B} \right)^2 Z \frac{3J_{\text{eff}}^2}{T^2} \quad \text{Eq. 5}$$

Where  $Z = 6$  is the number of nearest neighbors,  $J = 1/2$  is the effective angular momentum and  $J_{\text{eff}}$  is the effective spin-spin coupling strength. Fitting the experimental data measured at  $B = 0$  using Eq. 5 gives  $J_{\text{eff}} = 0.2$  K (see Fig. 3b in the main text).

## S6. Entropy

The entropy content  $S_m$  of a magnetic system is given by:

$$S_m = R \ln(2J + 1) \quad \text{Eq. 6}$$

where  $J$  is the effective spin. The magnetic entropy can be determined from the experimental specific heat as:

$$\frac{S_m(T)}{R} = \int_0^T \frac{c_m}{T} dT \quad \text{Eq. 7}$$

Figure S5 shows  $S_m$  as a function of temperature for  $B = 1$  T obtained from the  $c_m$  data shown in Figure 2b of the main text. A saturation value of  $S_m \approx R \ln 2 = 0.69R$  is found which, according to Eq. 6, corresponds to  $J = 1/2$ . In addition, this shows that the  $J = 1/2$  ground state is the only populated level below 10 K.

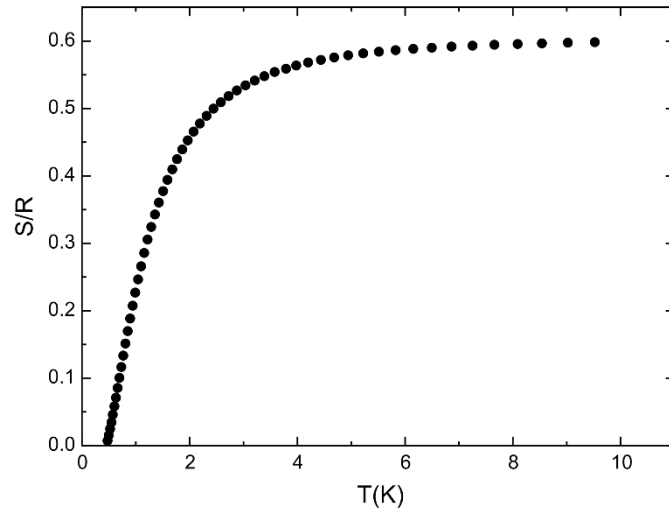

**Figure S 5.** Magnetic entropy  $S_m$  calculated by using Eq. 7 and the specific heat at  $B = 1$  T in the main text. The saturation value is close to 0.69, consistent with a  $J = 1/2$  ground state. The entropy shows that the ground state is the only populated level in this range of temperatures

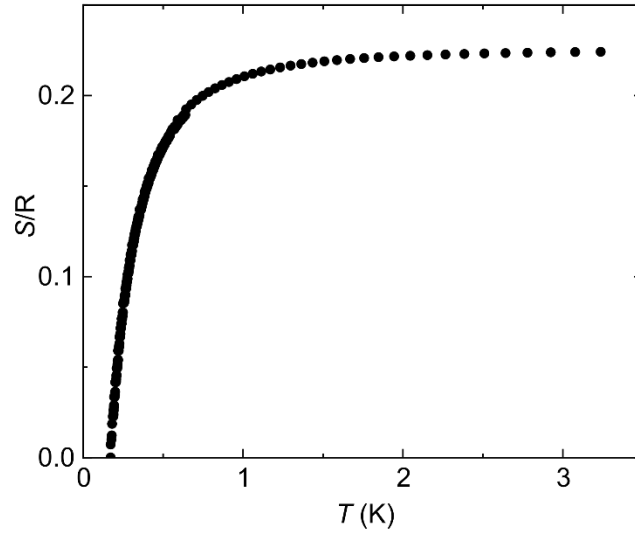

**Figure S 6.** Magnetic entropy  $S_m$  calculated by using Eq. 7 and the specific heat at  $B = 0$  T in the main text.

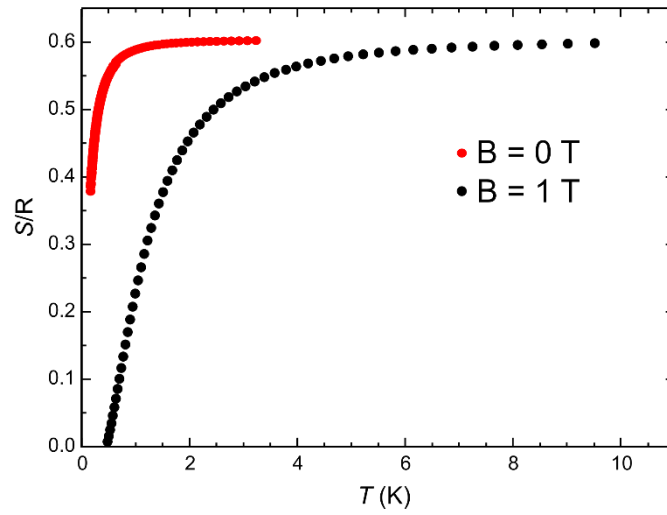

**Figure S 7.** Magnetic entropy at 0 T and 1 T from Figures S5 and S6. Entropy at 0 T has been scaled for comparison.

## S7. Modelling of the magnetic susceptibility measurements

Figure 4a in the main manuscript shows that  $\chi'T$  continuously drops with decreasing temperature. This occurs mainly as a consequence of the depopulation of excited electronic states.

The temperature dependence of  $\chi$  can be described by considering the two lowest doublets separated by the energy  $\Delta$ :<sup>3</sup>

$$\chi = \frac{N}{k_B(T-T_0)} \left\{ C_0 + C_1 \left( \frac{2k_B T}{\Delta} \right) \tanh \left( \frac{\Delta}{2k_B T} \right) + C_2 \tanh \left( \frac{\Delta}{2k_B T} \right) \right\} + \chi_0 \quad \text{Eq. 8}$$



Where  $N$  is the number of paramagnetic entities,  $k_B$  is the Boltzmann constant, the  $C_0$ ,  $C_1$  and  $C_2$  quantities depend on the electronic wave function of the two Kramers doublets involved, and  $\chi_0$  accounts for diamagnetic and other temperature independent contributions to the magnetic susceptibility.  $T_0$  accounts for the magnetic interactions with the neighboring atoms, and plays the role of an effective Weiss temperature.

The fit to the experimental  $\chi T$  in Figure 4a is obtained with the values summarized in Table S4. The large  $\Delta$  value confirms that the system can be simplified to a single  $J = 1/2$  doublet below 15 K. Moreover, the curve can only be fitted by introducing a finite  $T_0$  value, accounting for interactions.

Note that  $C_2$  is negligible small within the error. For low enough temperatures, that that is  $T \ll \Delta$ , the susceptibility can be approximated to  $\chi = N(C_0+C_2)/k_B (T-T_0)+\chi_0$ , as shown in ref<sup>1</sup>. A negligible small  $C_2$  value would imply a  $\chi \approx N(C_0)/k_B (T-T_0)+\chi_0$ , that is, the Curie law for an isolated doublet. In other words the smaller  $C_2$  the more the system behaves as an isolated doublet at low temperatures.

**Table S 4.** Fitting values for the parameters in Eq. 8.

| Parameter | Fitting value  |
|-----------|----------------|
| $\Delta$  | 366 K          |
| $C_0$     | 1.68 emuK/mol  |
| $C_1$     | 8.23 emuK/mol  |
| $C_2$     | 0 emuK/mol     |
| $X_0$     | -0.031 emu/mol |
| $T_0$     | -0.38 K        |

## S8. Bibliography

- 1 C. J. Nuttall, PhD Thesis: Bimetallic tris-oxalate magnets: Synthesis, structure and properties. ProQuest U642291. University of London, 1998.
- 2 A. Abragam and B. Bleaney, *Electron Paramagnetic Resonance of Transition Ions (Oxford Classic Texts in the Physical Sciences)*, Oxford University Press, USA, 2012.
- 3 E. Bartolomé, P. J. Alonso, A. Arauzo, J. Luzón, J. Bartolomé, C. Racles and C. Turta, *Dalt. Trans.*, 2012, **41**, 10382–10389.
